# Supplementary material for: Fabrication and characterization of magnetic mesoporous silica nanospheres covalently bonded with europium complex
Source: Royal Society of Chemistry journal article supplement (doi:10.1039/b924061f), 2010-01-01
Supplement: b924061f.pdf [file b924061f.pdf]

## Supporting Information

# Fabrication and Characterization of Magnetic Mesoporous Silica Nanospheres Covalently bonded with Europium Complex

Jing Feng,<sup>ab</sup> Wei-Qiang Fan,<sup>ab</sup> Shu-Yan Song,<sup>ab</sup> Ying-Ning Yu,<sup>a</sup> Rui-Ping Deng,<sup>ab</sup>  
and Hong-Jie Zhang\*<sup>a</sup>

<sup>a</sup> *State Key Laboratory of Rare Earth Resource Utilization, Changchun Institute of Applied Chemistry, Chinese Academy of Sciences, Changchun 130022, P. R. China*

<sup>b</sup> *Graduate School of the Chinese Academy of Sciences, Beijing, P. R. China*

\* Author to whom correspondence should be addressed. Phone: +86-431-85262127.

Fax: +86-431-85698041. E-mail: [hongjie@ciac.jl.cn](mailto:hongjie@ciac.jl.cn).

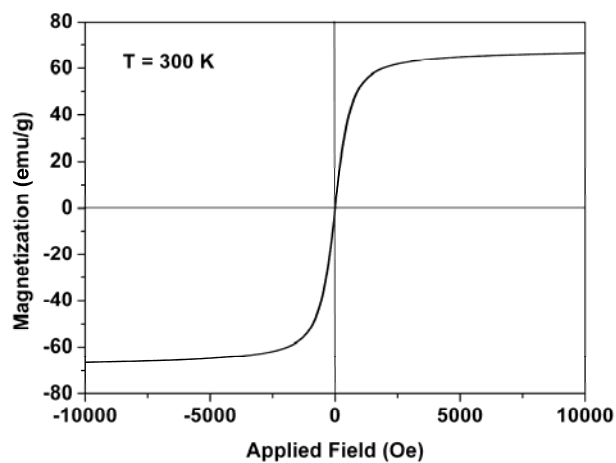

Fig. S1 Magnetization-applied magnetic field of oleic acid stabilized Fe<sub>3</sub>O<sub>4</sub> particles at 300 K.
